# Supplementary material for: An atlas of gene expression and gene co-regulation in the human retina
Source: PubMed Central journal article supplement (PMC4937338; doi:10.1093/nar/gkw486), 2016-05-27

**Supplementary Figure S10: gene expression of selected genes that are mostly expressed in cellular subpopulations.**

Panels show the overall gene expression (gray) versus the expression of single gene (blue or orange). X-axis reports level of gene expression, y-axis reports density. Blue is for Photoreceptor genes, orange for RPE genes. Usually, photoreceptor genes are more expressed and RPE gene are less expressed than the rest of genes.

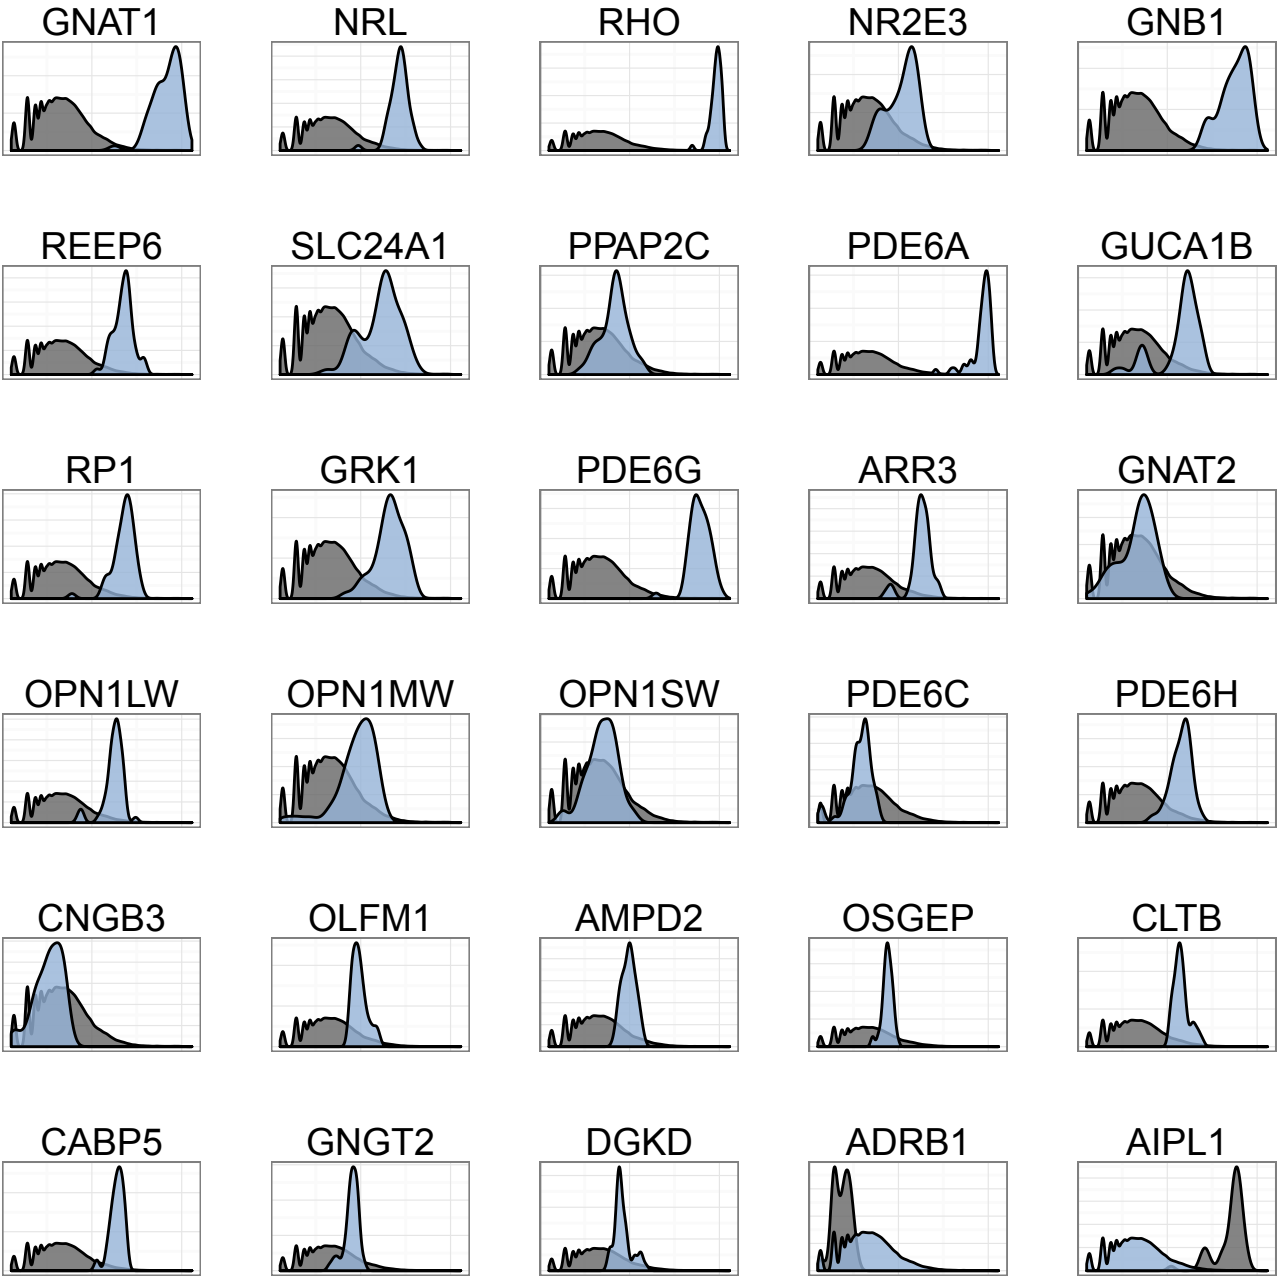

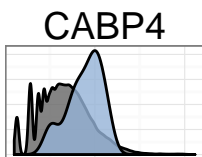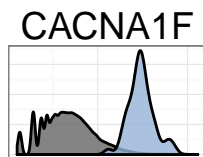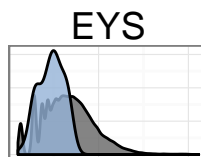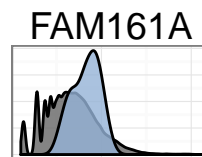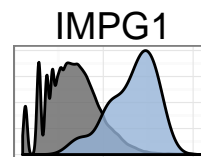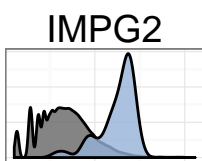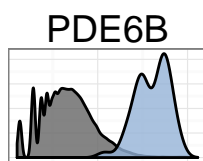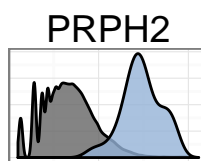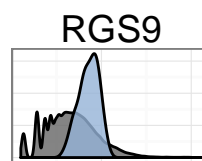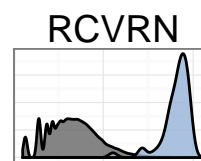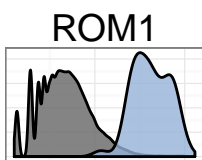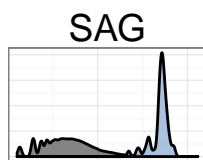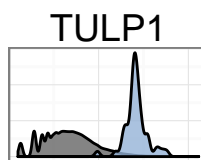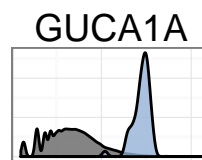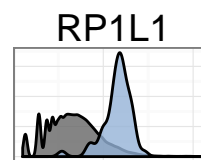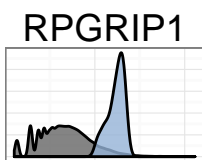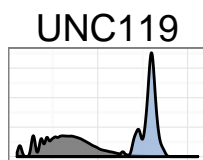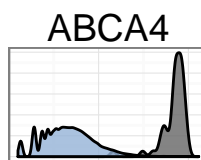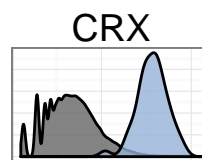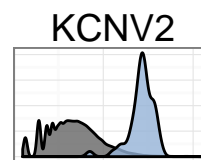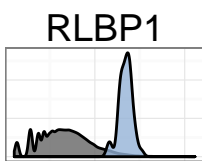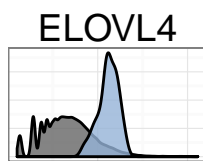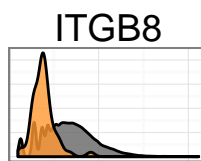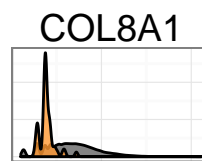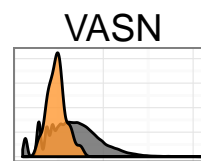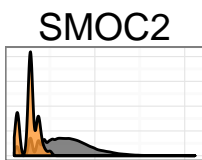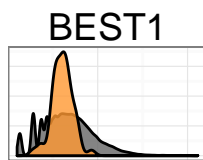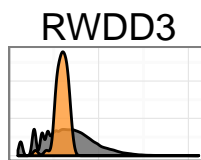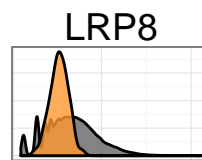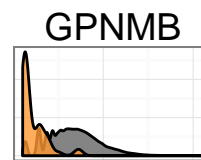

Supplement: supp_gkw486_nar-00602-z-2016-File010.pdf [file supp_gkw486_nar-00602-z-2016-File010.pdf]
