# Supplementary material for: An atlas of gene expression and gene co-regulation in the human retina
Source: PubMed Central journal article supplement (PMC4937338; doi:10.1093/nar/gkw486), 2016-05-27

## Supplementary Figure S11: distribution of expressed genes by chromosome.

Overall gene expression stratified by chromosome. Genes mapping to mitochondrial chromosome contributed largely to overall retina gene expression.

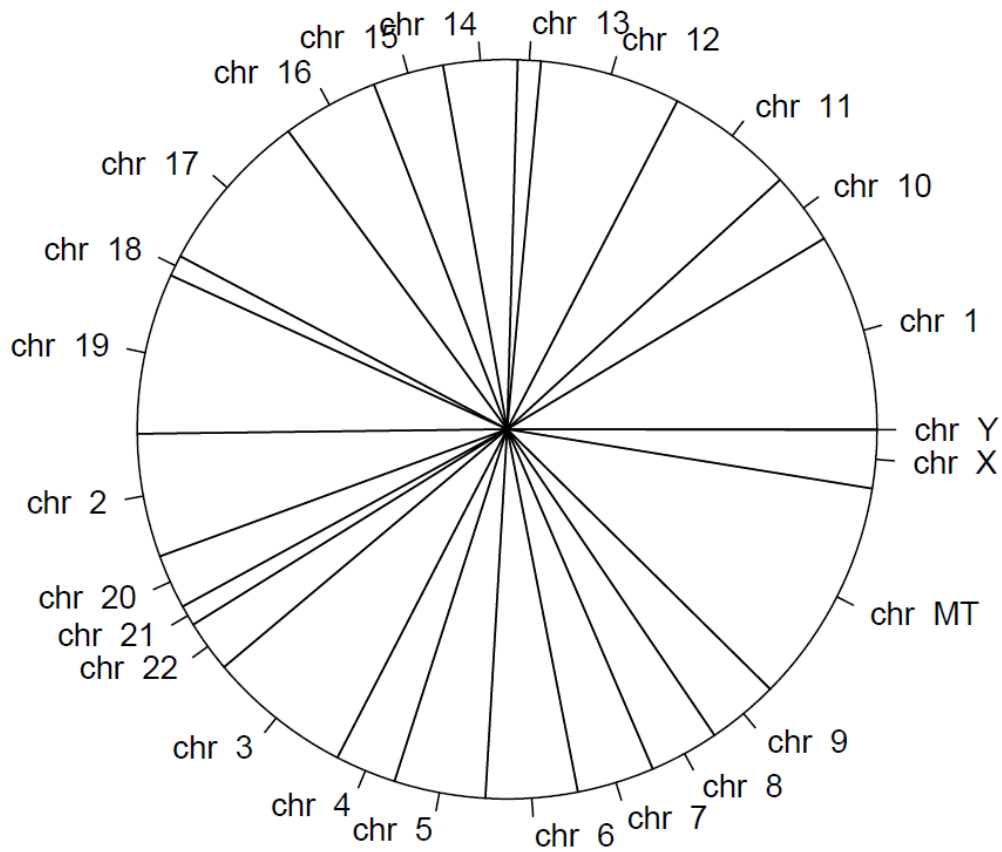

## Supplementary Figure S12: GSEA top enriched GO categories for the most-expressed genes

Gene Set Enrichment Analysis of GO-categories (MSIG C5) against gene expression.

### A: Detection of External Stimulus

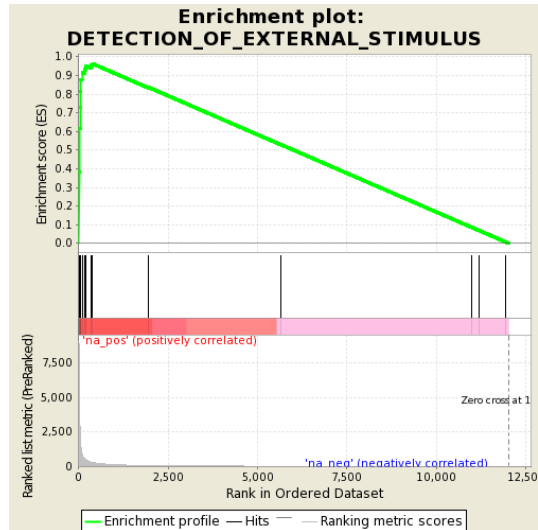

### B: Response to light stimulus

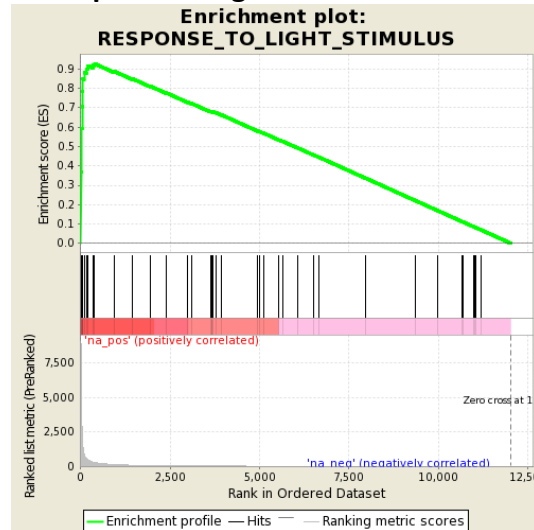

### C: Sensory perception

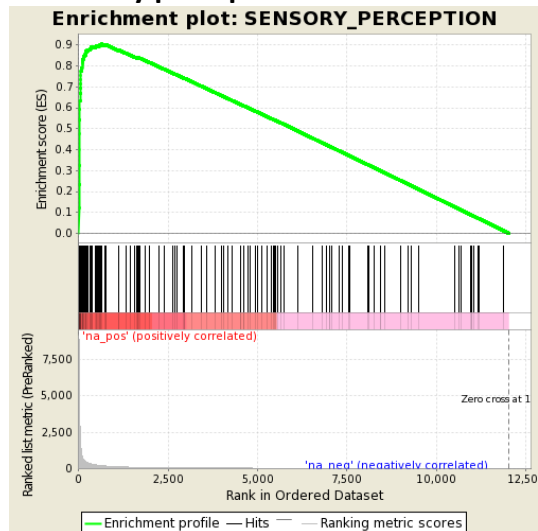

| Gene-set                                             | SIZE | ES   | NES  | NOM p-val | FDR q-val | FWER p-val |
|------------------------------------------------------|------|------|------|-----------|-----------|------------|
| DETECTION_OF_STIMULUS                                | 46   | 0.97 | 1.49 | 0         | 0         | 0          |
| DETECTION_OF_EXTERNAL_STIMULUS                       | 22   | 0.98 | 1.47 | 0         | 0.00349   | 0.007      |
| DETECTION_OF_STIMULUS_INVOLVED_IN_SENSORY_PERCEPTION | 20   | 0.97 | 1.46 | 0         | 0.010968  | 0.032      |
| DETECTION_OF ABIOTIC_STIMULUS                        | 18   | 0.97 | 1.45 | 0         | 0.01371   | 0.051      |
| RESPONSE_TO_LIGHT_STIMULUS                           | 45   | 0.93 | 1.43 | 0         | 0.096122  | 0.381      |
| SENSORY_PERCEPTION                                   | 188  | 0.91 | 1.43 | 0         | 0.080102  | 0.381      |
| RESPONSE_TO_RADIATION                                | 58   | 0.91 | 1.42 | 0         | 0.085039  | 0.453      |
| RHODOPSIN LIKE RECEPTOR_ACTIVITY                     | 133  | 0.88 | 1.39 | 0         | 0.23993   | 0.866      |
| CARBOHYDRATE_KINASE_ACTIVITY                         | 15   | 0.94 | 1.39 | 0.012     | 0.226234  | 0.881      |
| STRUCTURAL_CONSTITUENT_OF_RIBOSOME                   | 80   | 0.88 | 1.38 | 0         | 0.327751  | 0.963      |

## Supplementary Figure S13: Expression of retina-important genes

Gene Set Enrichment Analysis of Photoreceptor and RetNet genes against gene expression.

### A: Photoreceptors

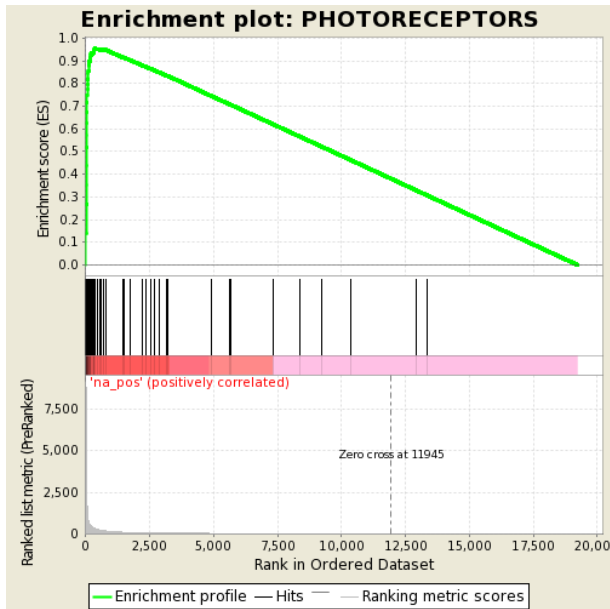

### B: RetNet

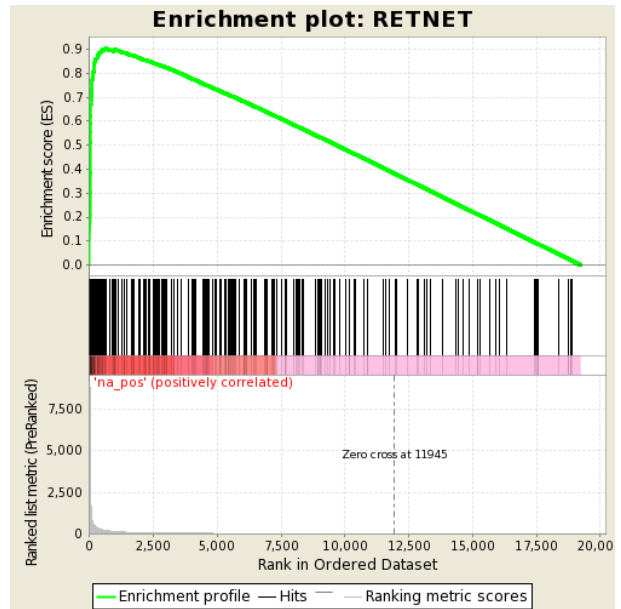

## Supplementary Figure S14: GSEA top enriched GO categories for the most and less variably expressed genes

Gene Set Enrichment Analysis of GO-categories (MSIG C5) against gene expression variability (CV).

### A. Most variable

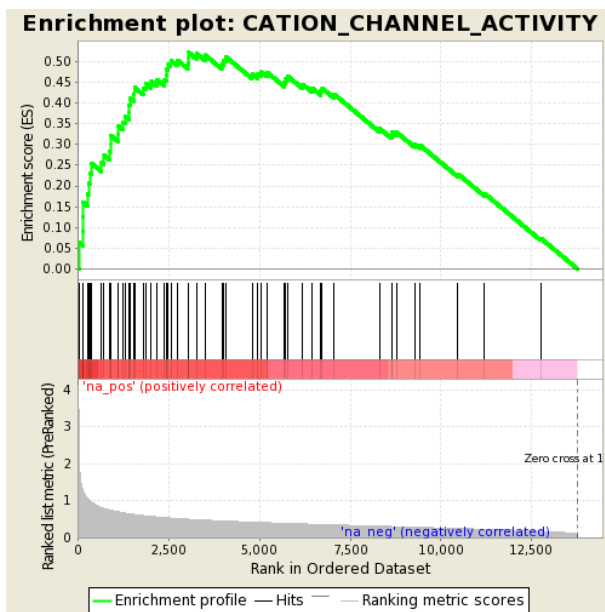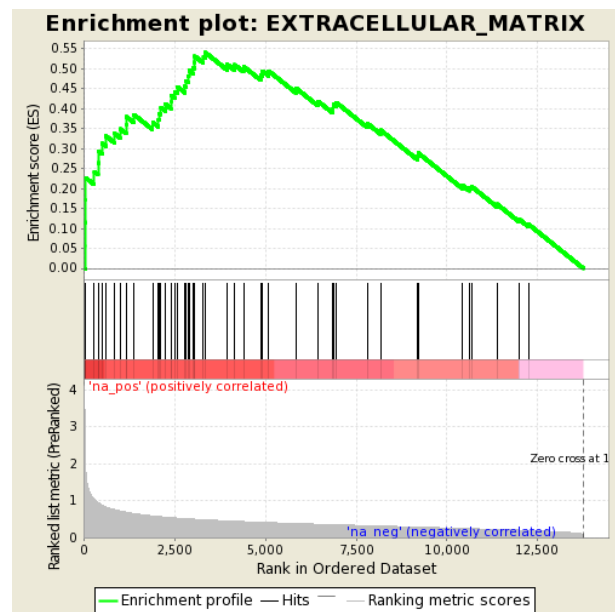

### B. Less variable

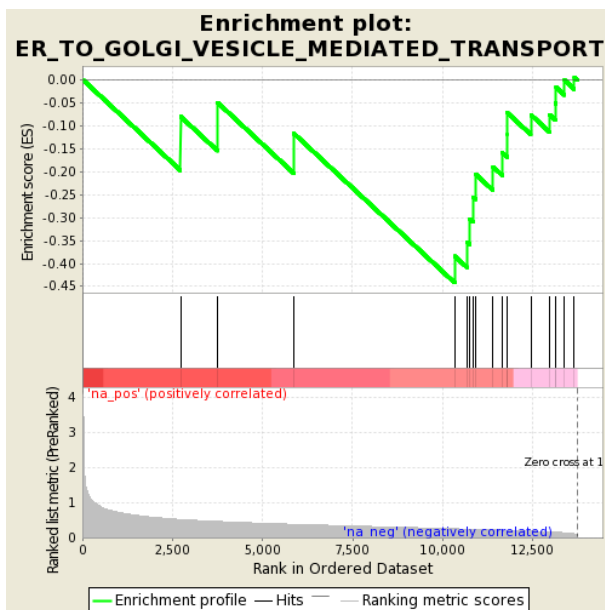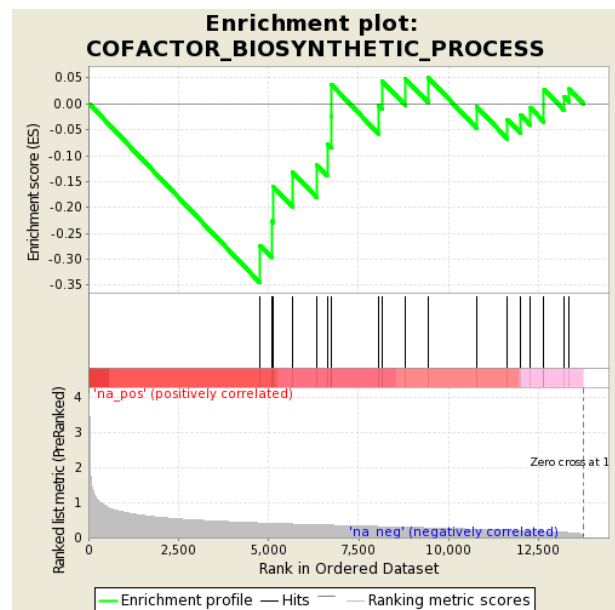

## Supplementary Figure S15: Overlap between ObsT and RefT

A: overlap between the genes that have been found as expressed in the ObsT and the RefT. Areas are not proportional to the number of genes.

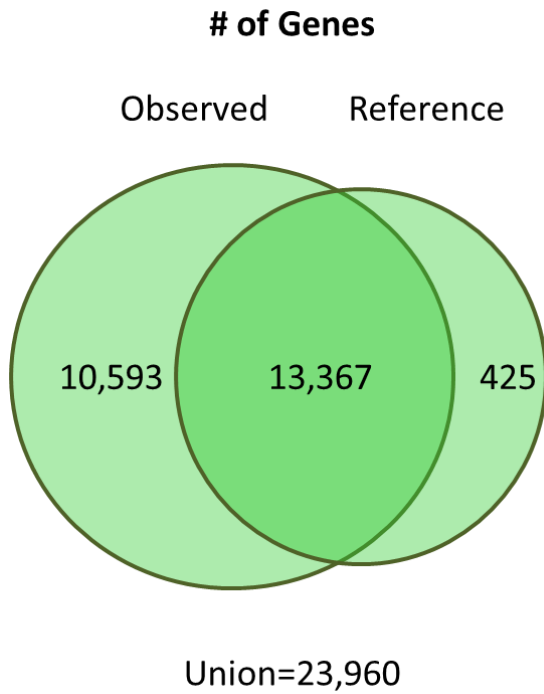

B: Scatterplot of the estimated gene expression in the RefT (y-axis) and ObsT (x-axis).

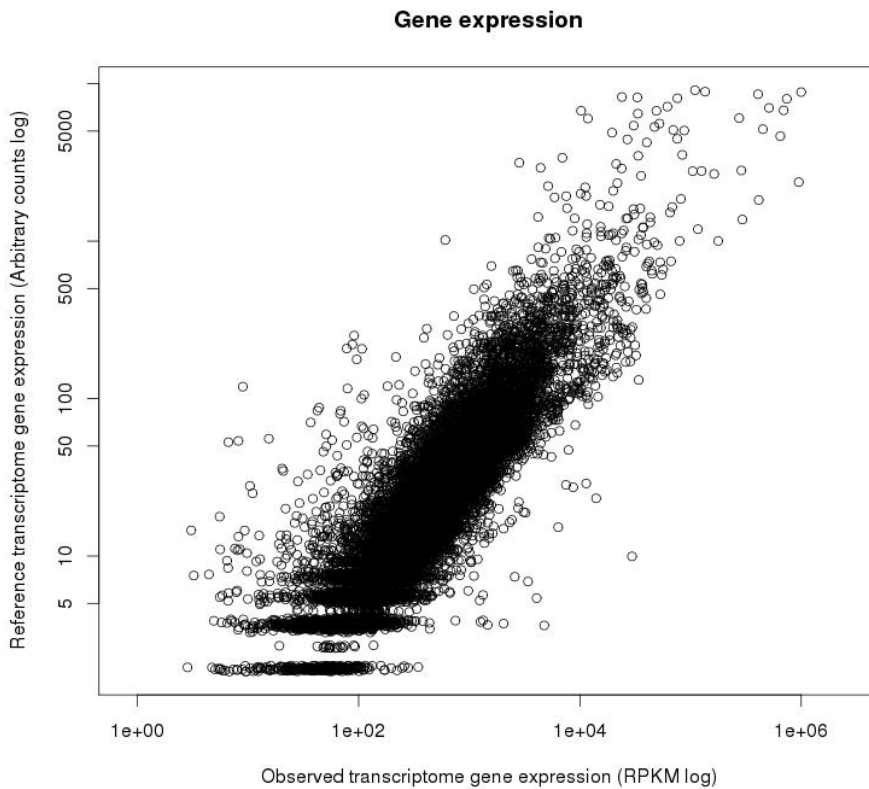

## Supplementary Figure S16: Expression level of ObsT genes stratified by their presence also in the RefT.

The “Not in Reference Transcriptome” box shows the expression of ObsT-only genes. The “In Reference Transcriptome” shows the expression of ObsT and RefT genes.

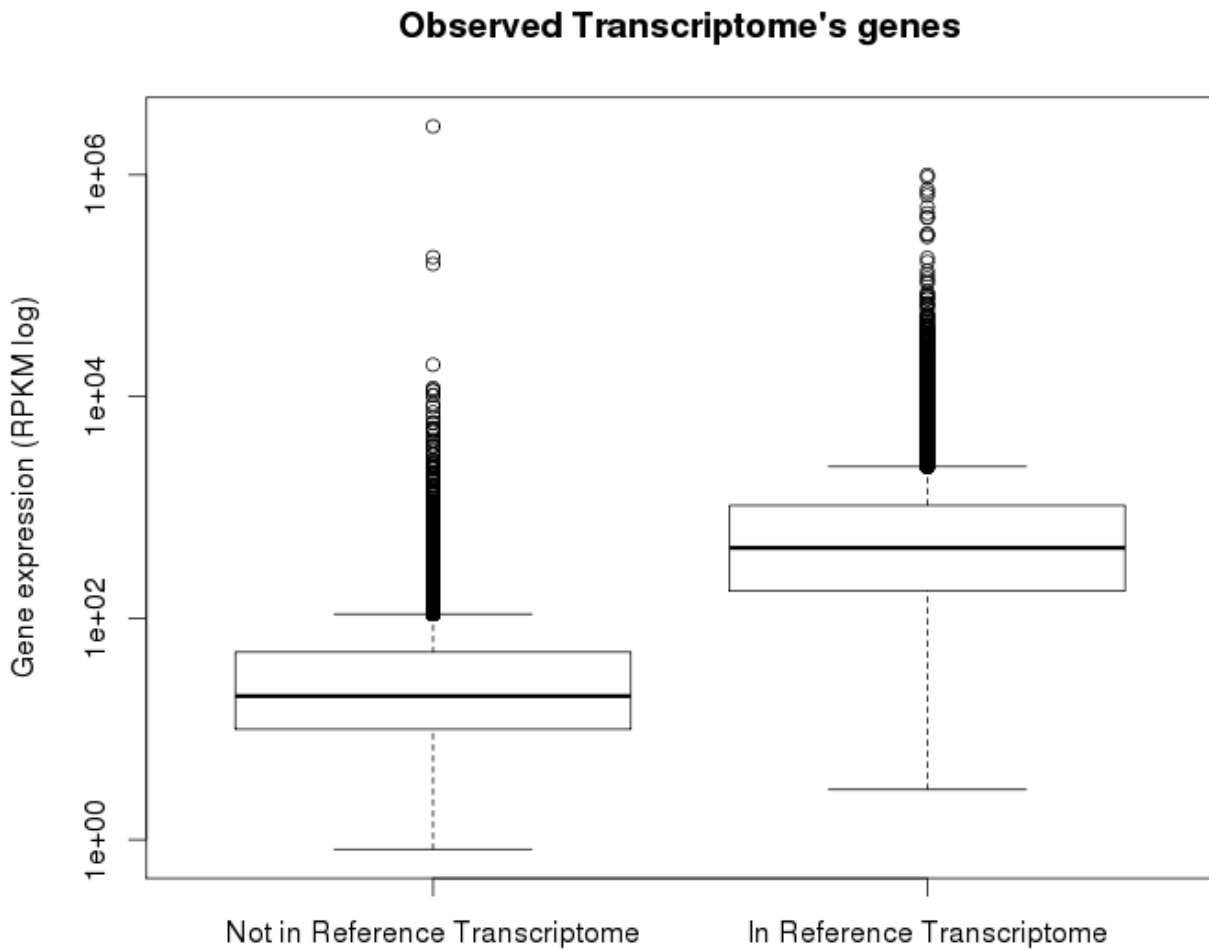

## Supplementary Figure S17: Alignment of RNAseq data on two regions of mitochondrial genome

UCSC genome browser snapshots of two mitochondrial chromosome regions. Three tracks are shown: on top the coverage, on the middle the aligned reads, and on bottom the known genes. The plots show that the genic regions are more covered than intergenic regions, consistent with a proper enrichment of transcripts rather than genomic DNA. Panel A shows region chrM:1-8000 and B chrM:4600-6600.

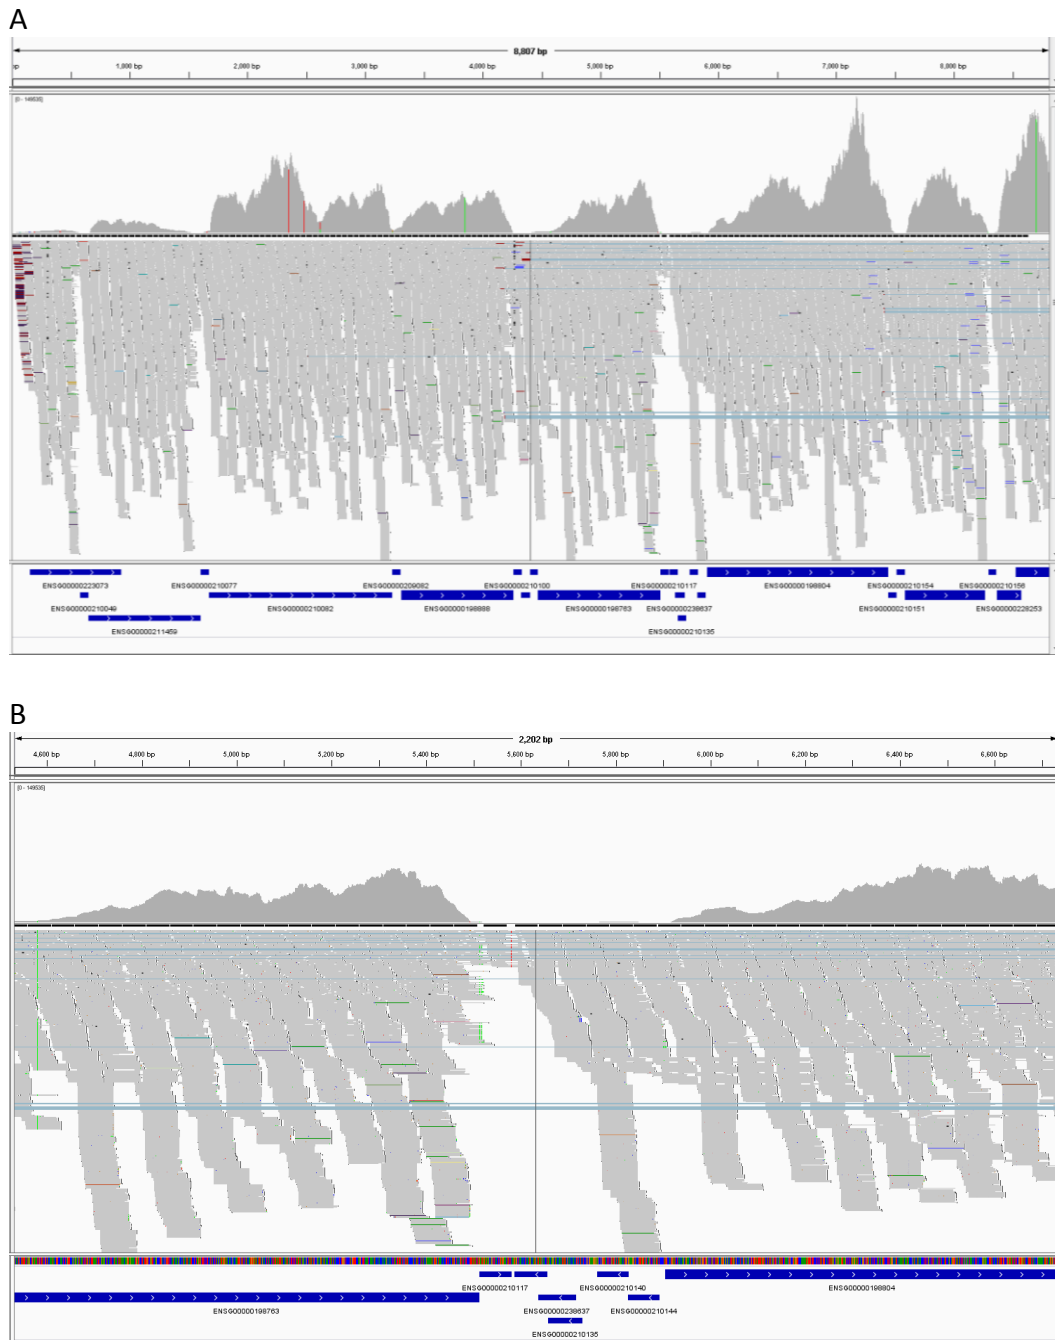

Supplement: supp_gkw486_nar-00602-z-2016-File011.pdf [file supp_gkw486_nar-00602-z-2016-File011.pdf]
