# Supplementary material for: An atlas of gene expression and gene co-regulation in the human retina
Source: PubMed Central journal article supplement (PMC4937338; doi:10.1093/nar/gkw486), 2016-05-27

### Supplementary Figure S3: (A) Precision-recall and (B) Receiver-Operator Characteristic (ROC) curve of the Gene network with the STRING interactions

Agreement between gene co-expression network and protein-protein interactions as derived from STRING database.

A: precision-recall curve

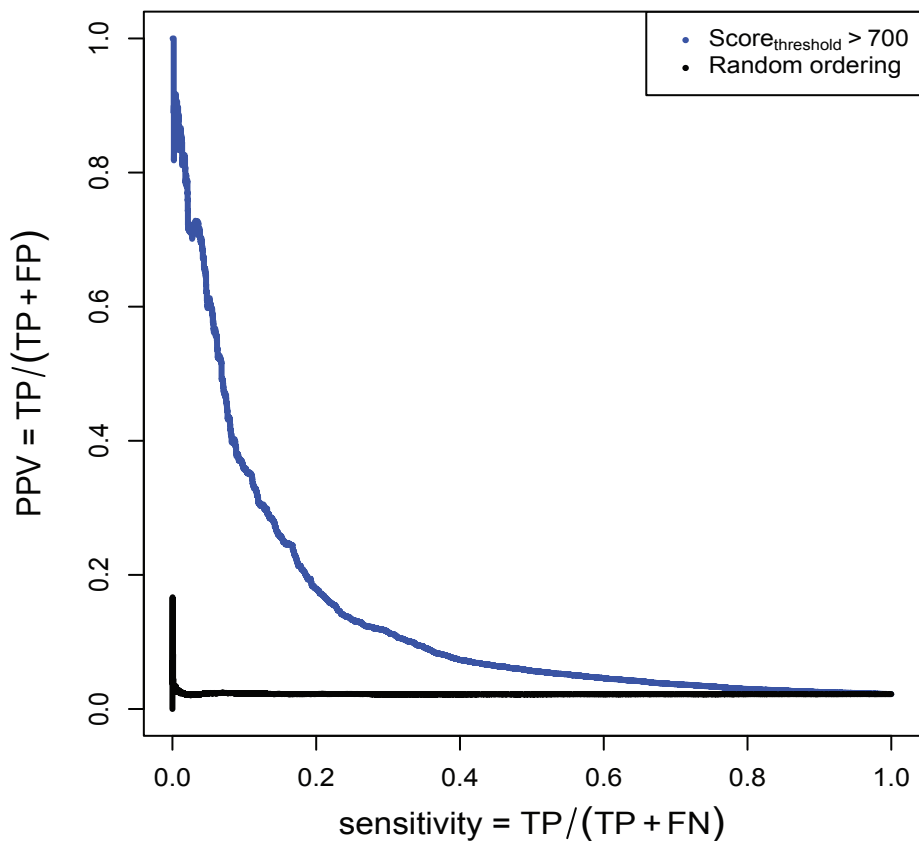

B: receiver-operator characteristic (ROC) curve

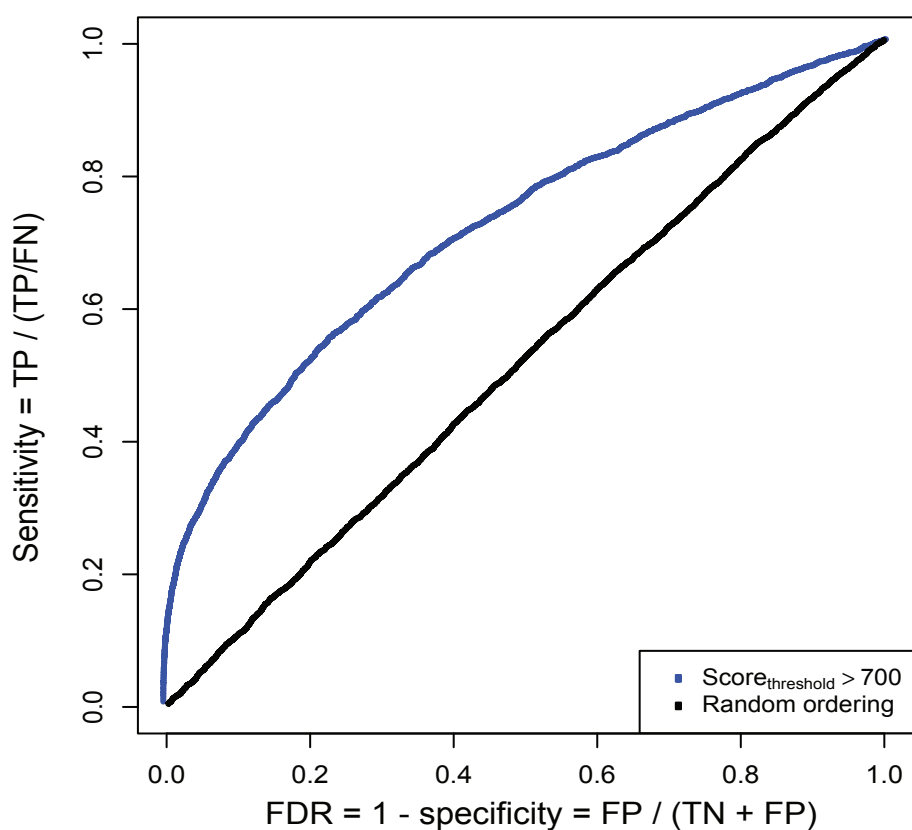

Supplement: supp_gkw486_nar-00602-z-2016-File008.pdf [file supp_gkw486_nar-00602-z-2016-File008.pdf]
